# Supplementary material for: Desmoschinensisflavones A and B, two rare flavones having a hybrid benzyl benzoate ester-flavone structural framework from Desmos chinensis Lour
Source: Royal Society of Chemistry journal article supplement (doi:10.1039/d0ra09985f), 2020-01-01
Supplement: d0ra09985f1.pdf [file d0ra09985f1.pdf]

## Electronic Supplementary Information

### Desmoschinensisflavones A and B, two rare flavones having a hybrid benzyl benzoate ester-flavone structural framework from *Desmos chinensis* Lour.

Isaraporn Polbuppha,<sup>a,b</sup> Virayu Suthiphasilp,<sup>a</sup> Tharakorn Maneerat,<sup>a,c</sup> Rawiwan Charoensup,<sup>c,d</sup> Thunwadee Limtharakul,<sup>e</sup> Sarot Cheenpracha,<sup>f</sup> Stephen G. Pyne,<sup>\*b</sup> and Surat Laphookhieo<sup>\*a,c</sup>

<sup>a</sup>Center of Chemical Innovation for Sustainability (CIS) and School of Science, Mae Fah Luang University, Chiang Rai 57100, Thailand

<sup>b</sup>School of Chemistry and Molecular Bioscience, University of Wollongong, Wollongong, New South Wales 2522, Australia

<sup>c</sup>Medicinal Plant Innovation Center of Mae Fah Luang University, Chiang Rai 57100, Thailand.

<sup>d</sup>School of Integrative Medicine, Mae Fah Luang University, Chiang Rai 57100, Thailand

<sup>e</sup>Department of Chemistry, Faculty of Science, Chiang Mai University, Chiang Mai 50200, Thailand

<sup>f</sup>School of Science, University of Phayao, Phayao 56000, Thailand

\*Phone: +66-5391-6238; fax: +66-5391-6776; e-mail: surat.lap@mfu.ac.th

**Abstract:** Two rare flavones having a hybrid benzyl benzoate ester-flavone structural framework, desmoschinensisflavones A and B (**1** and **2**), together with 12 known compounds (**3-14**) were isolated from the fruit, leaf, and twig extracts of *Desmos chinensis* (red flower). The new structures were characterized by UV, IR, NMR, and HRESITOFMS data. Desmoschinensisflavones A and B have a distinctive skeleton of benzoate ester-flavones with a C-4' and C-6 and C-8 connection via a methylene group, respectively. Plausible biosynthesis pathways to compounds **1** and **2** are proposed based on an intermolecular nucleophilic 1,4-addition to *ortho*-quinone intermediates. Compounds **6-8** and **12** showed weakly antioxidant inhibition with IC<sub>50</sub> values in the range of 65.4-74.6  $\mu$ M.

**Keywords:** *Desmos chinensis*; Hybrid benzoate ester-flavones; Antioxidant;  $\alpha$ -Glucosidase inhibition

## Contents

|                                                                                        | Page |
|----------------------------------------------------------------------------------------|------|
| <b>Figure S1</b> $^1\text{H}$ NMR spectrum of <b>1</b> recorded in $\text{CDCl}_3$     | 3    |
| <b>Figure S2</b> $^{13}\text{C}$ NMR spectrum of <b>1</b> recorded in $\text{CDCl}_3$  | 3    |
| <b>Figure S3</b> DEPT 135 NMR spectrum of <b>1</b> recorded in $\text{CDCl}_3$         | 4    |
| <b>Figure S4</b> COSY spectrum of <b>1</b> recorded in $\text{CDCl}_3$                 | 4    |
| <b>Figure S5</b> HSQC spectrum of <b>1</b> recorded in $\text{CDCl}_3$                 | 5    |
| <b>Figure S6</b> HMBC spectrum of <b>1</b> recorded in $\text{CDCl}_3$                 | 5    |
| <b>Figure S7</b> NOESY spectrum of <b>1</b> recorded in $\text{CDCl}_3$                | 6    |
| <b>Figure S8</b> ESITOFMS spectrum of compound <b>1</b> .                              | 6    |
| <b>Figure S9</b> $^1\text{H}$ NMR spectrum of <b>2</b> recorded in $\text{CDCl}_3$     | 7    |
| <b>Figure S10</b> $^{13}\text{C}$ NMR spectrum of <b>2</b> recorded in $\text{CDCl}_3$ | 7    |
| <b>Figure S11</b> COSY spectrum of <b>2</b> recorded in $\text{CDCl}_3$                | 8    |
| <b>Figure S12</b> HSQC spectrum of <b>2</b> recorded in $\text{CDCl}_3$                | 8    |
| <b>Figure S13</b> HMBC spectrum of <b>2</b> recorded in $\text{CDCl}_3$                | 9    |
| <b>Figure S14</b> ESITOFMS spectrum of compound <b>2</b> .                             | 9    |
| <b>Bioactivities</b>                                                                   | 10   |

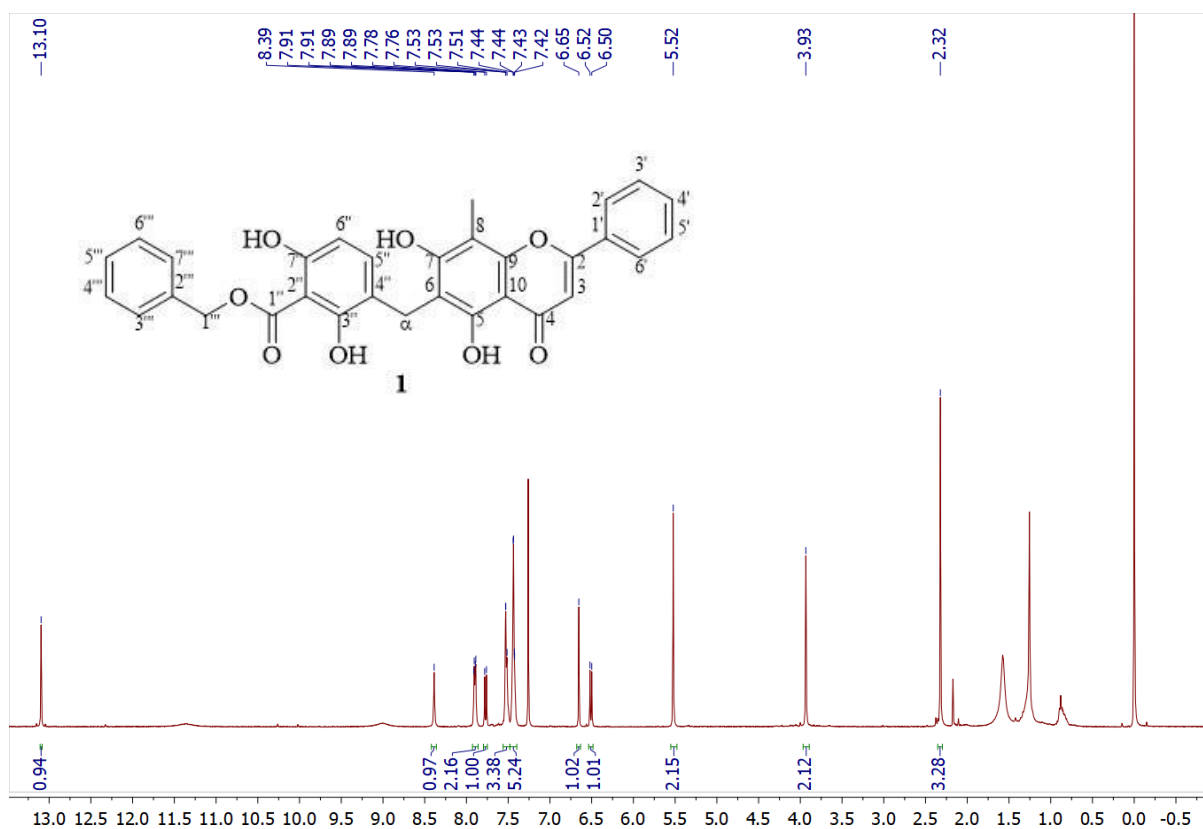

Figure S1  $^1\text{H}$  NMR spectrum of **1** recorded in  $\text{CDCl}_3$

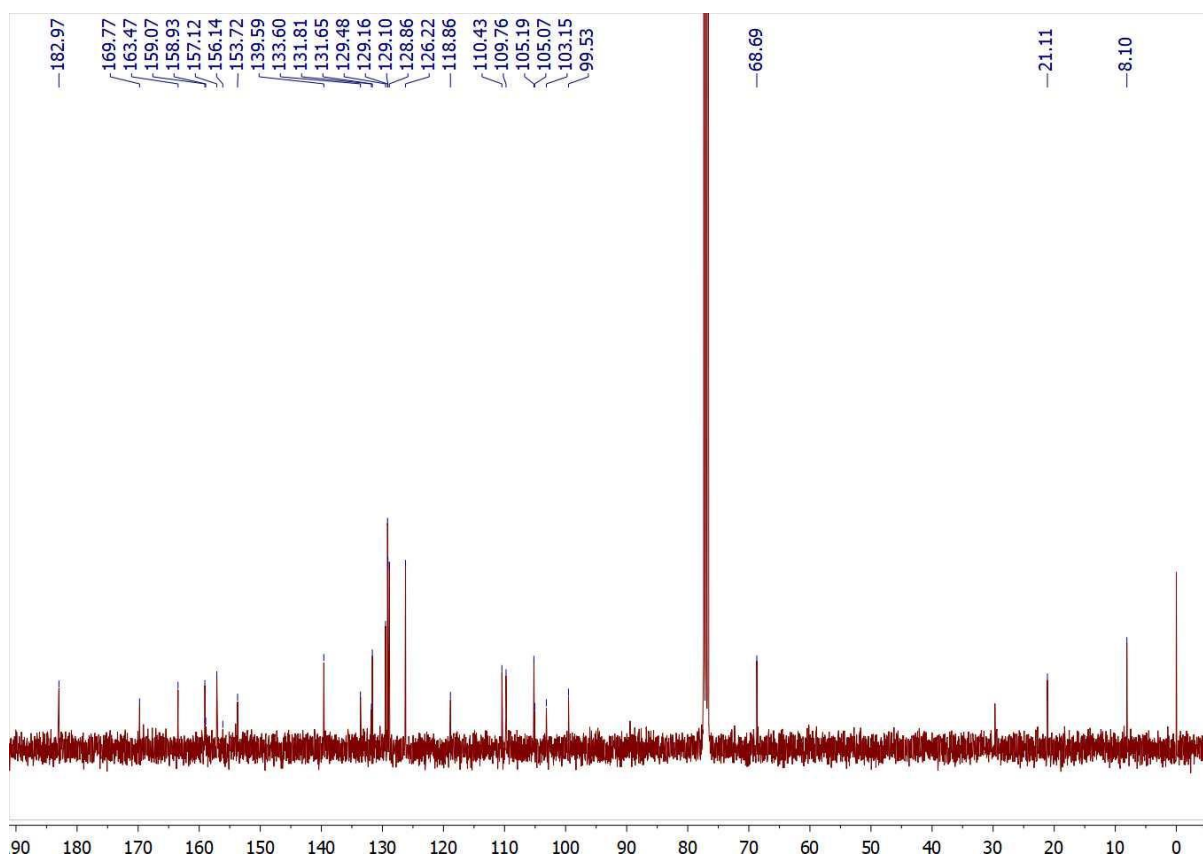

Figure S2  $^{13}\text{C}$  NMR spectrum of **1** recorded in  $\text{CDCl}_3$

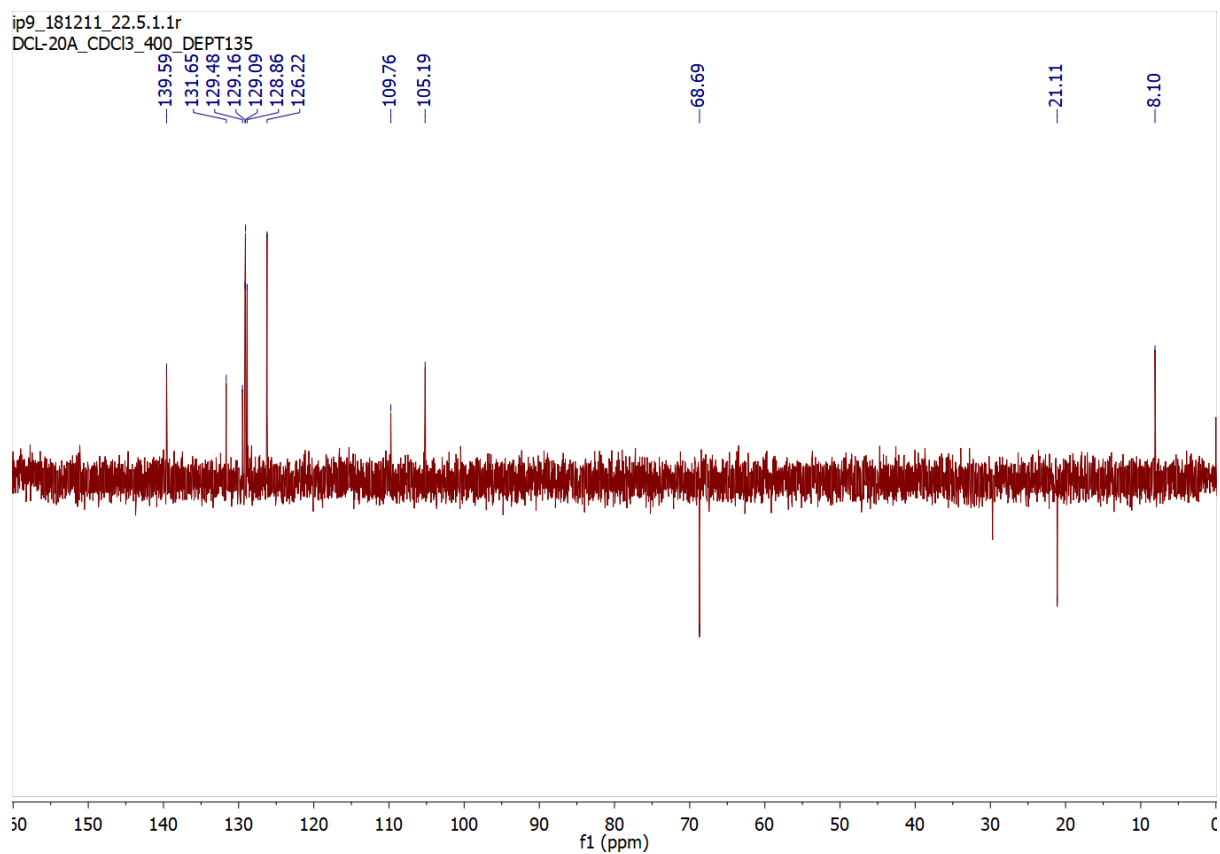

**Figure S3** DEPT 135 spectrum of **1** recorded in  $\text{CDCl}_3$

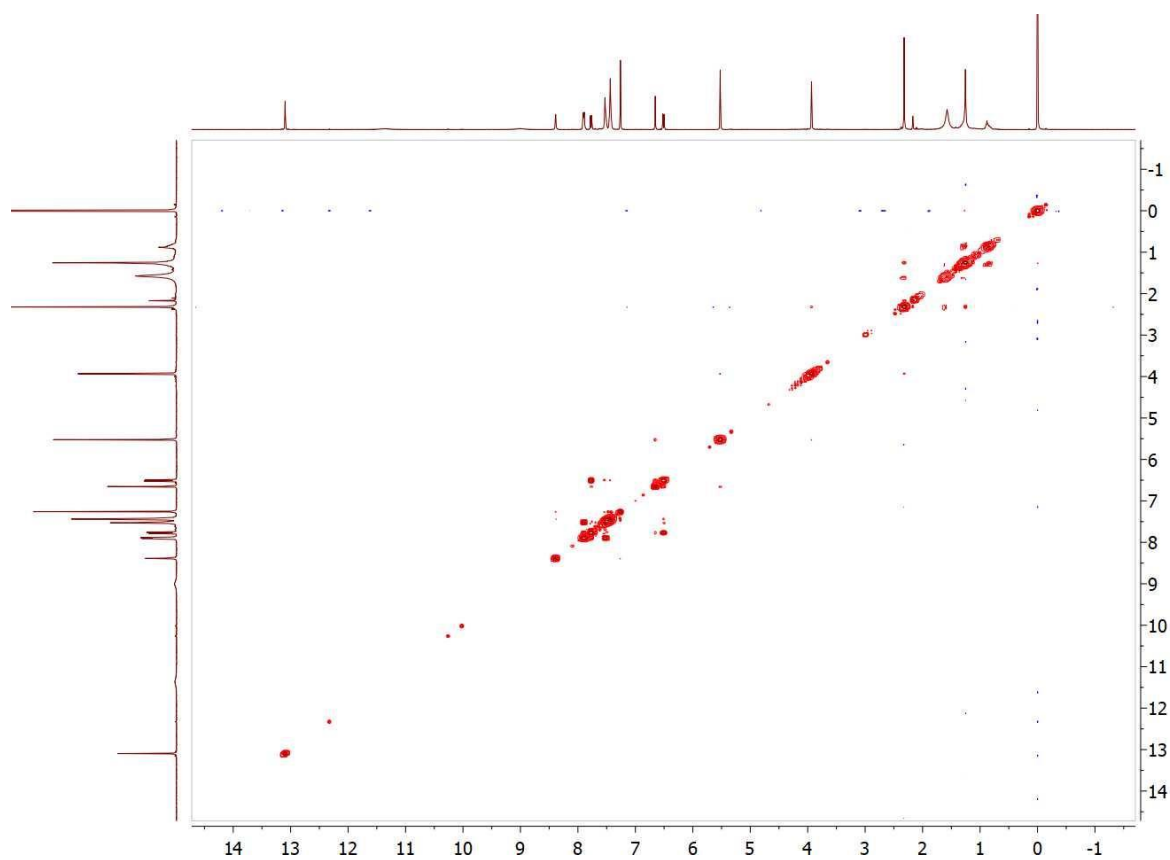

**Figure S4** COSY spectrum of **1** recorded in  $\text{CDCl}_3$

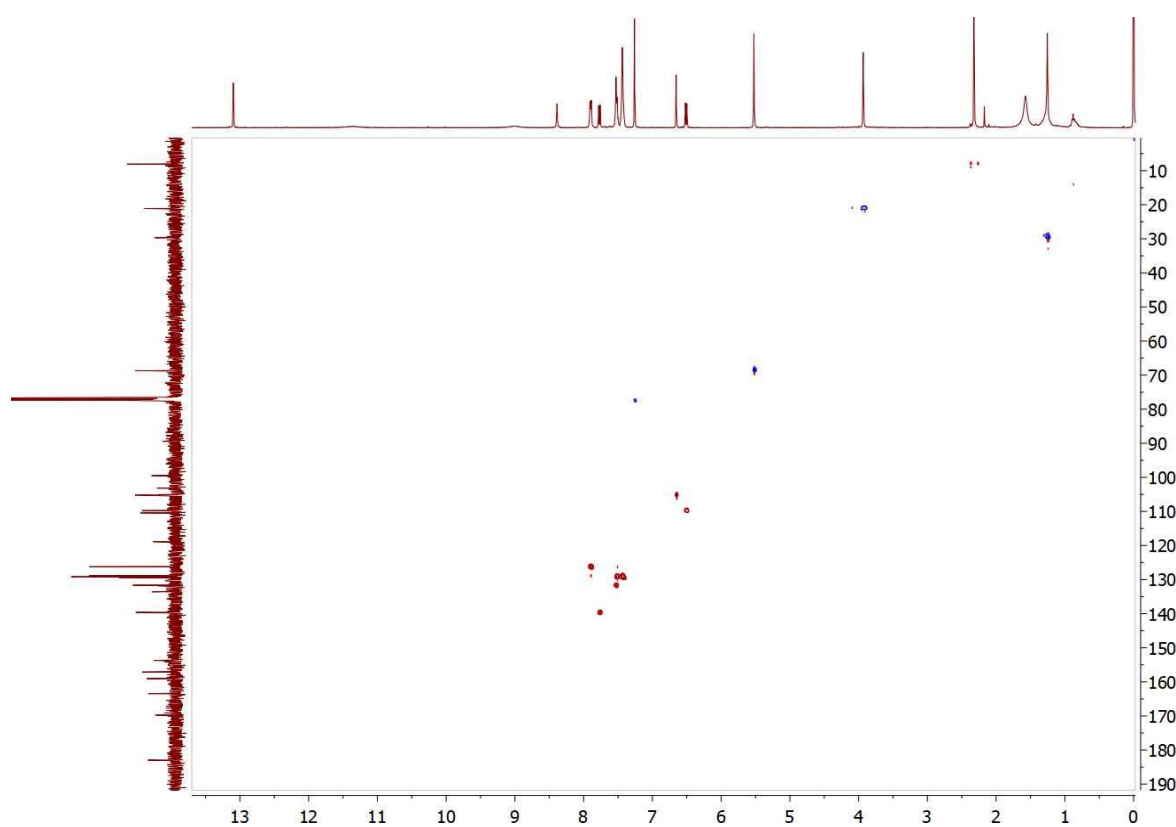

**Figure S5** HSQC spectrum of **1** recorded in  $\text{CDCl}_3$

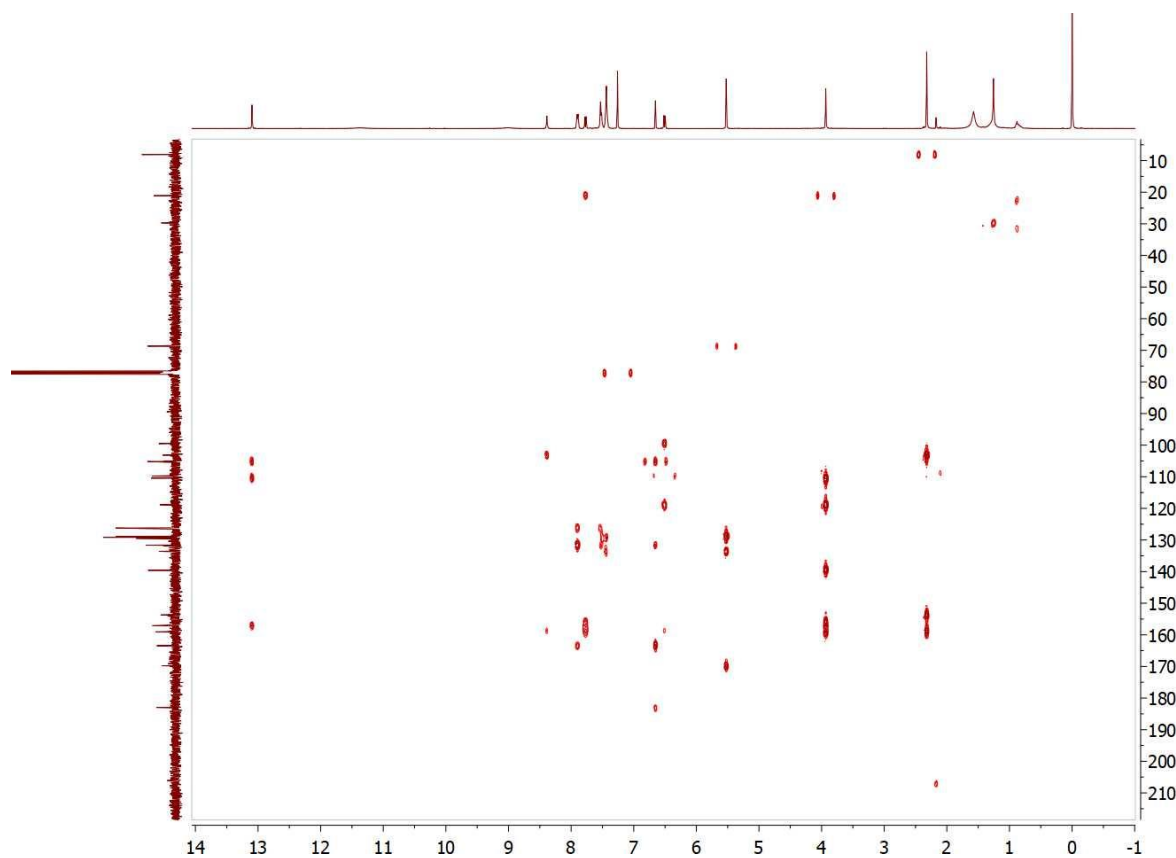

**Figure S6** HMBC spectrum of **1** recorded in  $\text{CDCl}_3$

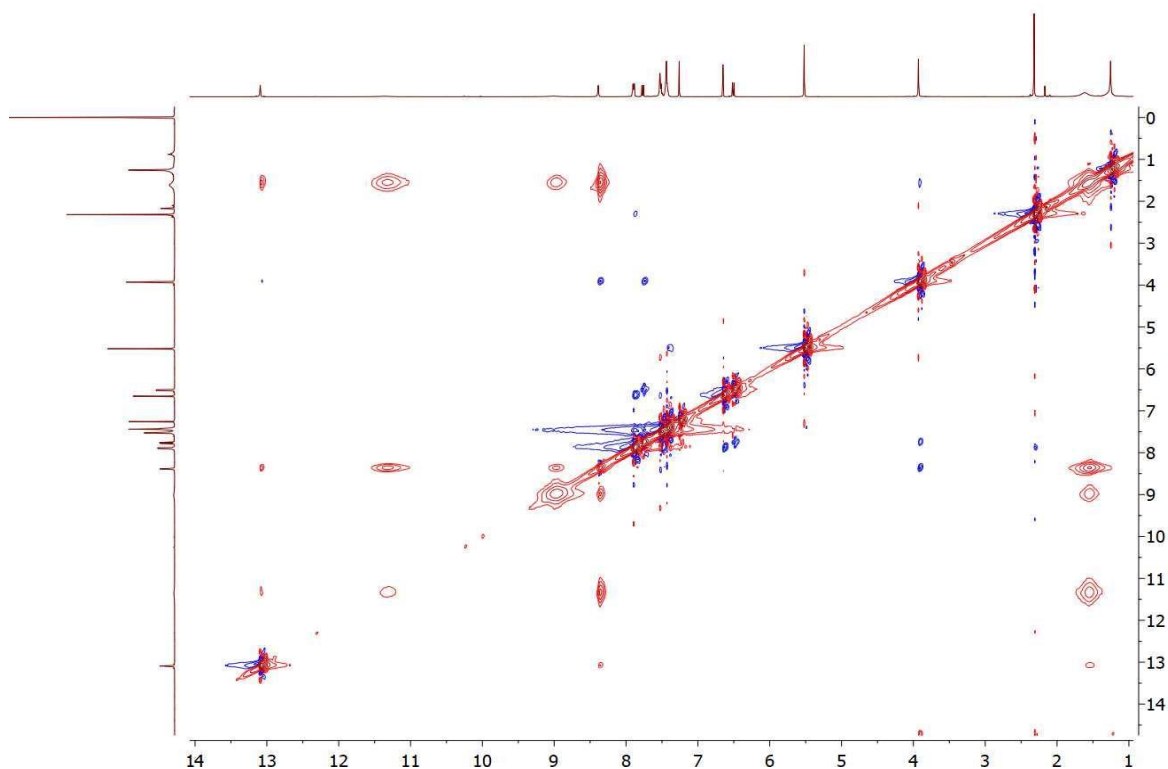

Figure S7 NOESY spectrum of **1** recorded in  $\text{CDCl}_3$

# Elemental Composition Report

Page 1

## Single Mass Analysis

Tolerance = 5.0 PPM / DBE: min = -1.5, max = 120.0

Element prediction: Off

Number of isotope peaks used for i-FIT = 3

Monoisotopic Mass, Even Electron Ions

1144 formula(e) evaluated with 9 results within limits (all results (up to 1000) for each mass)

Elements Used:

C: 9-33 H: 3-70 N: 0-10 O: 0-11 Na: 0-1

DCL-20A

SP I Polbuppha DCL-20A 41 (0.835) Cm (40:42)

1: TOF MS ES-  
4.85e+002

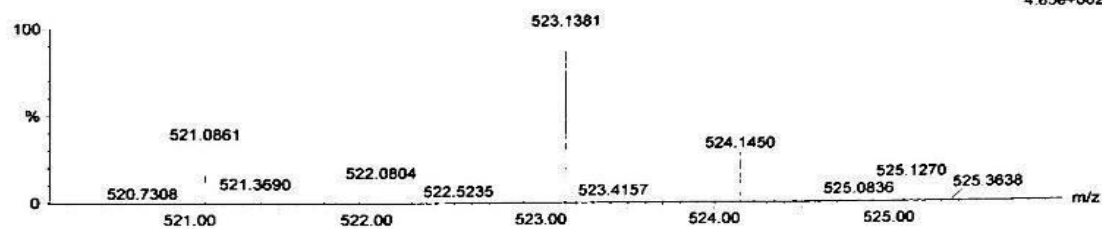

| Minimum: |                 |             |             | -1.5        |             |              |            |            |           |     |
|----------|-----------------|-------------|-------------|-------------|-------------|--------------|------------|------------|-----------|-----|
| Maximum: |                 | 55.0        | 5.0         | 120.0       |             |              |            |            |           |     |
| Mass     | Calc. Mass      | mDa         | PPM         | DBE         | i-FIT       | i-FIT (Norm) | Formula    |            |           |     |
| 523.1381 | 523.1382        | -0.1        | -0.2        | 22.5        | 92.5        | 2.2          | C30        | H20        | N4        | O4  |
|          |                 |             |             |             |             |              | Na         |            |           |     |
|          | 523.1379        | 0.2         | 0.4         | 26.5        | 92.5        | 2.3          | C28        | H15        | N10       | O2  |
|          | <b>523.1393</b> | <b>-1.2</b> | <b>-2.3</b> | <b>20.5</b> | <b>92.2</b> | <b>1.9</b>   | <b>C31</b> | <b>H23</b> | <b>O8</b> |     |
|          | 523.1369        | 1.2         | 2.3         | 17.5        | 92.0        | 1.8          | C29        | H24        | O8        | Na  |
|          | 523.1366        | 1.5         | 2.9         | 21.5        | 92.2        | 2.0          | C27        | H19        | N6        | O6  |
|          | 523.1396        | -1.5        | -2.9        | 27.5        | 93.0        | 2.7          | C31        | H16        | N8        | Na  |
|          | 523.1401        | -2.0        | -3.8        | 9.5         | 92.7        | 2.4          | C18        | H24        | N6        | O11 |
|          |                 |             |             |             |             |              | Na         |            |           |     |
|          | 523.1406        | -2.5        | -4.8        | 25.5        | 92.9        | 2.6          | C32        | H19        | N4        | O4  |
|          | 523.1355        | 2.6         | 5.0         | 23.5        | 92.6        | 2.3          | C26        | H16        | N10       | O2  |
|          |                 |             |             |             |             |              | Na         |            |           |     |

Figure S8 ESITOFMS spectrum of compound **1**.

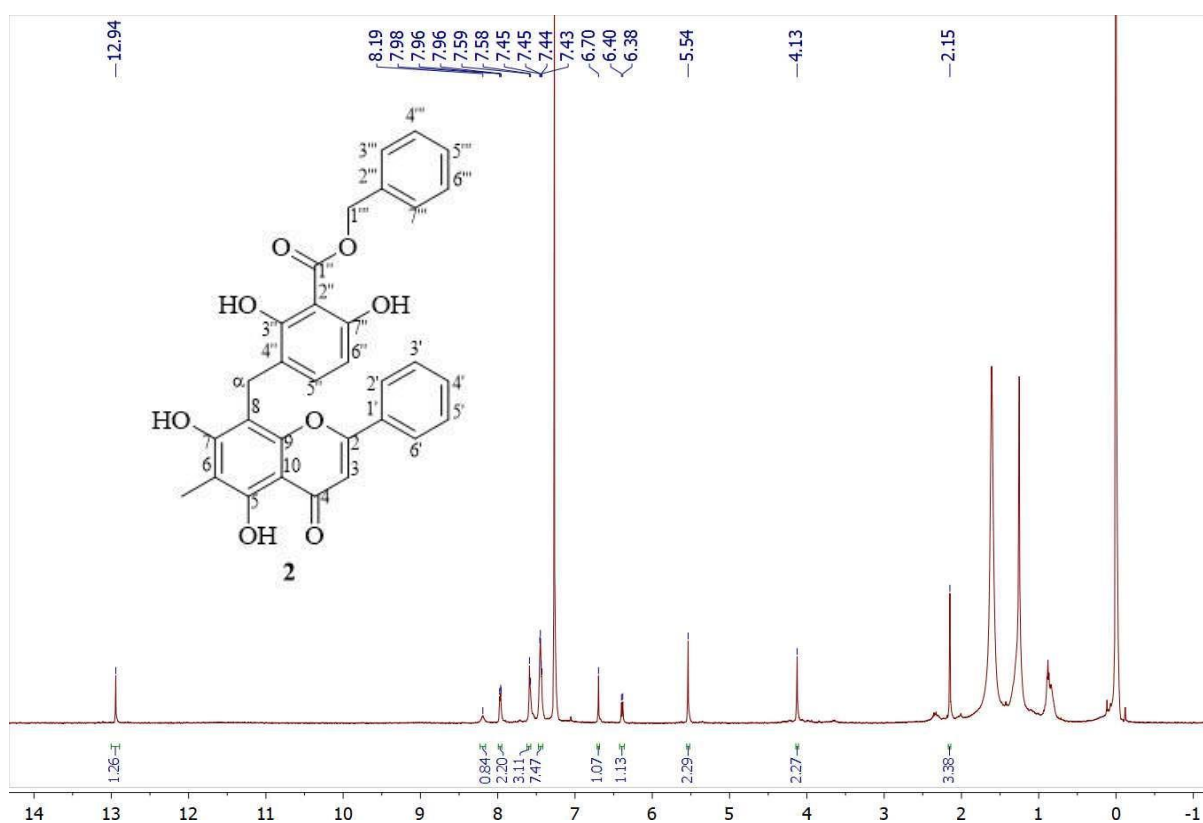

Figure S9  $^1\text{H}$  NMR spectrum of **2** recorded in  $\text{CDCl}_3$

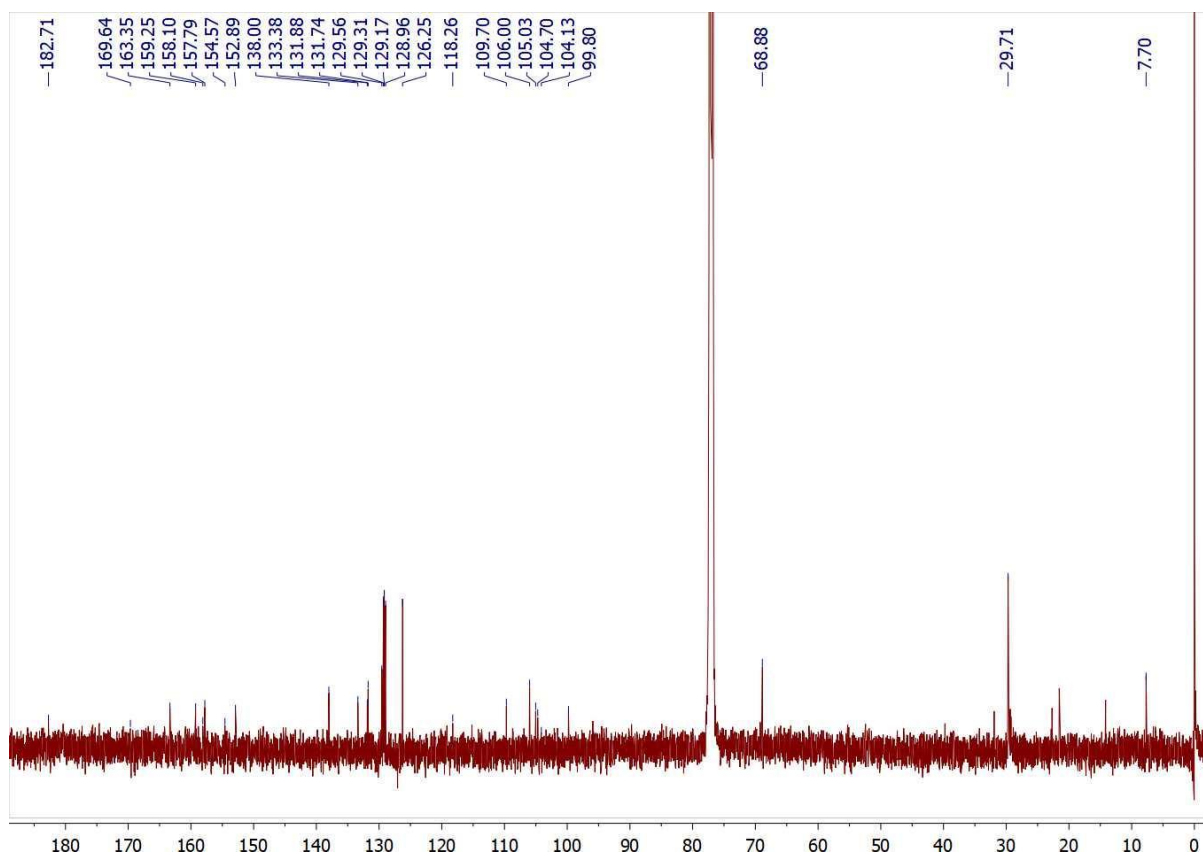

Figure S10  $^{13}\text{C}$  NMR spectrum of **2** recorded in  $\text{CDCl}_3$

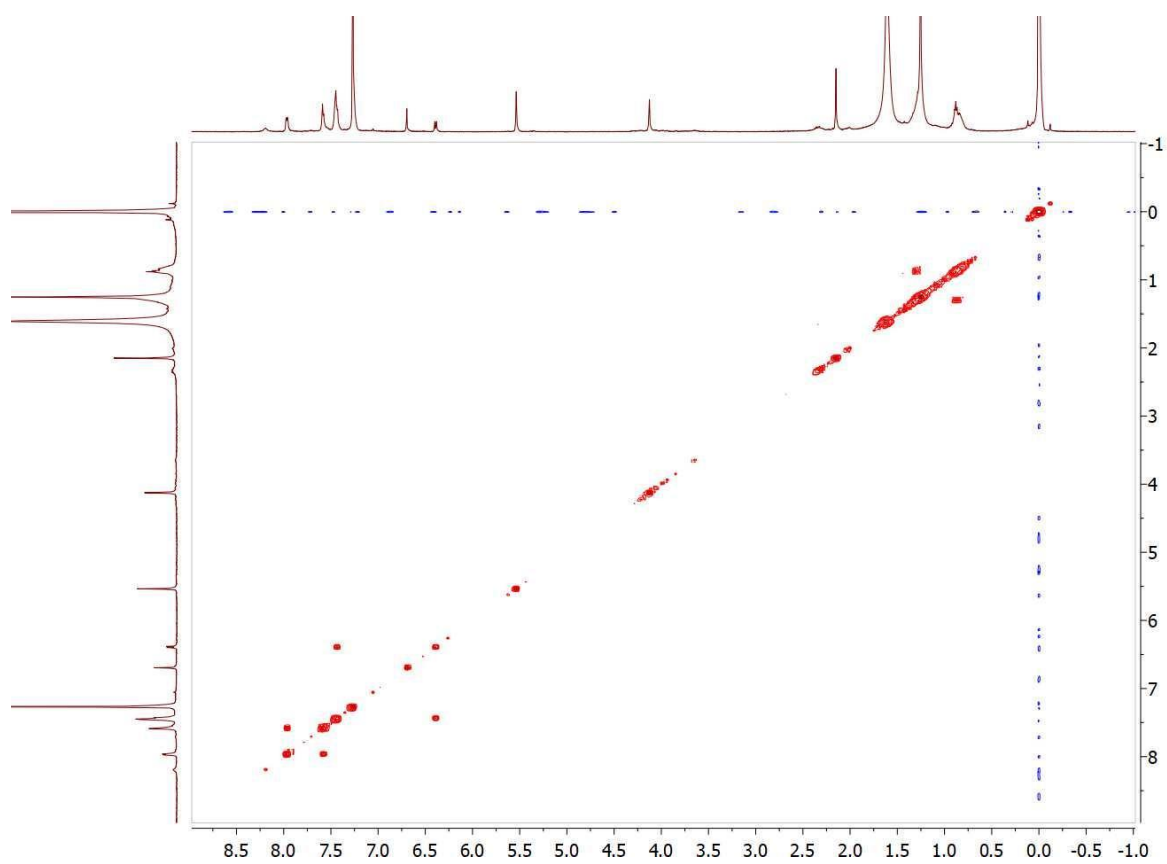

**Figure S11** COSY spectrum of **2** recorded in CDCl<sub>3</sub>

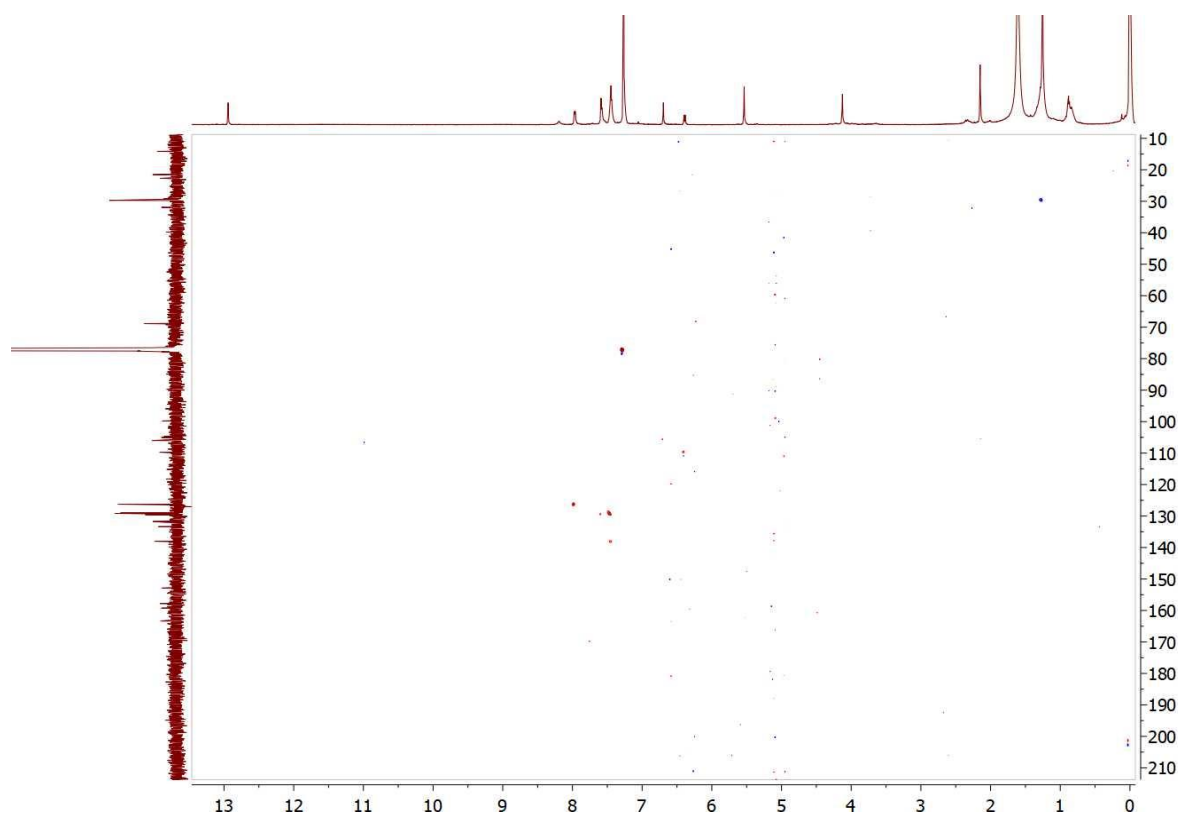

**Figure S12** HSQC spectrum of **2** recorded in CDCl<sub>3</sub>



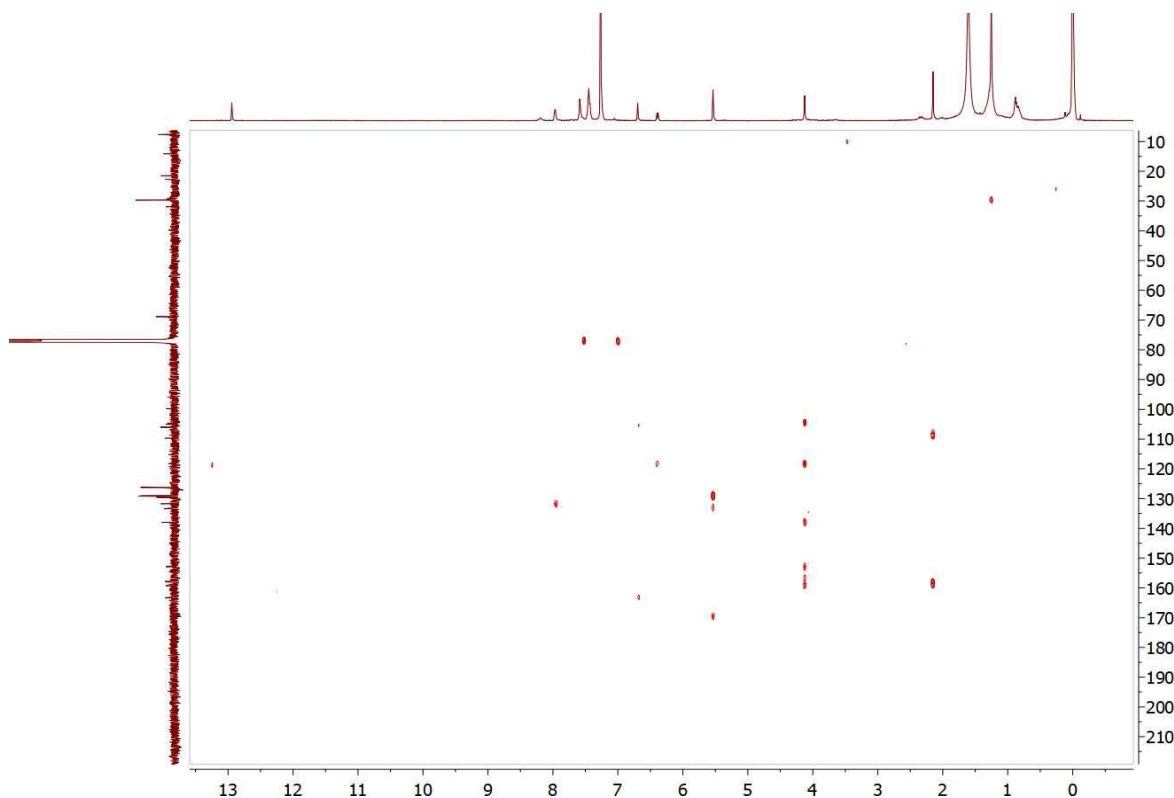

Figure S13 HMBC spectrum of **2** recorded in  $\text{CDCl}_3$

# Elemental Composition Report

Page 1

## Single Mass Analysis

Tolerance = 5.0 PPM / DBE: min = -1.5, max = 120.0

Element prediction: Off

Number of isotope peaks used for i-FIT = 3

Monoisotopic Mass, Even Electron Ions

685 formula(e) evaluated with 5 results within limits (all results (up to 1000) for each mass)

Elements Used:

C: 15-41 H: 3-70 N: 0-10 O: 0-11

DCL-22B

SP IPolbuppha DCL-22B 107 (2.119) Cm (107;109)

1: TOF MS ES-  
8.62e+001

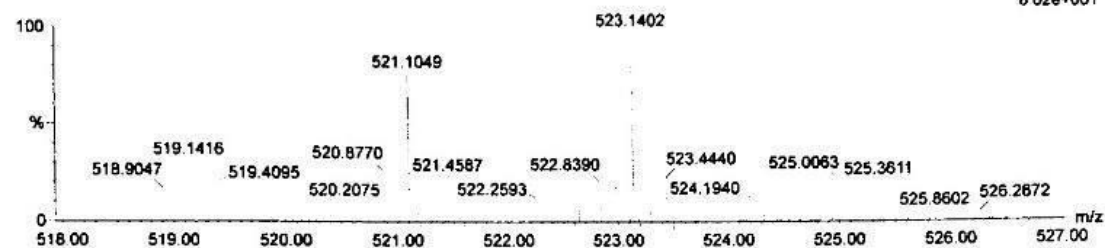

Minimum:

Maximum: 55.0 5.0 -1.5

| Mass     | Calc. Mass | mDa  | PPM  | DBE  | i-FIT | i-FIT (Norm) | Formula        |
|----------|------------|------|------|------|-------|--------------|----------------|
| 523.1402 | 523.1406   | -0.4 | -0.8 | 25.5 | 129.2 | 2.0          | C32 H19 N4 O4  |
|          | 523.1393   | 0.9  | 1.7  | 20.5 | 129.0 | 1.8          | C31 H23 O8     |
|          | 523.1420   | -1.8 | -3.4 | 30.5 | 129.4 | 2.3          | C33 H15 N8     |
|          | 523.1425   | -2.3 | -4.4 | 12.5 | 127.9 | 0.8          | C20 H23 N6 O11 |
|          | 523.1379   | 2.3  | 4.4  | 26.5 | 129.2 | 2.1          | C28 H15 N10 O2 |

Figure S14 ESITOFMS spectrum of compound **2**

## Bioactivities

**DPPH Radical Scavenging Assay.** The DPPH scavenging activity assay was modified from a previous paper.<sup>1,2</sup> Briefly,  $6 \times 10^{-5}$  M DPPH was prepared in absolute DMSO, and then 100  $\mu$ L of this solution was mixed with 100  $\mu$ L of the 1,000  $\mu$ g/mL sample solution in DMSO in a 96-well microplate. After 30 min of reaction, the absorbance was measured using a microplate reader (PerkinElmer, Inc., USA) at 517 nm in the dark at room temperature. All experiments were performed in triplicate, with ascorbic acid was used as a positive control ( $r^2 = 0.9982$ ). The half--maximal inhibitory concentration ( $IC_{50}$ ) of DPPH scavenging activity was calculated by plotting inhibition percentages against concentrations of the sample ( $IC_{50} = 15.9 \pm 0.3 \mu$ M). The percent inhibition was calculated with the following equation:

$$\text{Percent inhibition (\%)} = [((A - B) - (C - D)) / (A - B)] \times 100$$

where,

A is the absorbance of blank reaction containing DPPH solution and DMSO,

B is the absorbance of control reaction containing only DMSO,

C is the absorbance of sample reaction containing sample solution and DPPH solution,

D is the absorbance of control sample containing sample solution and DMSO.

**ABTS<sup>•+</sup> Scavenging Assay.** The determination of ABTS<sup>•+</sup> scavenging activity was carried out using a modified literature procedure.<sup>3,4</sup> ABTS<sup>•+</sup> were produced by reacting a 7 mM stock solution of ABTS in DI water with 2.45 mM potassium persulfate ( $K_2S_2O_8$ ) and allowing the mixture to stand in the dark at room temperature for 16 hr before use. The ABTS<sup>•+</sup> solution was diluted with water to an absorbance of  $0.7 \pm 0.02$  at 734 nm. Samples (1,000  $\mu$ g/mL) in DMSO (100  $\mu$ L) and ABTS<sup>•+</sup> solution (160  $\mu$ L) was added to each well of the 96-well microplate. The absorbance at 750 nm was determined after 5 min of mixture solution. The measurements were performed in triplicate, and the positive control was as an ascorbic acid ( $r^2 = 0.9999$ ,  $IC_{50} = 8.2 \pm 0.1 \mu$ M). The percent inhibition was calculated with the following equation:

$$\text{Percent inhibition (\%)} = [((A - B) - (C - D)) / (A - B)] \times 100$$

where,

A is the absorbance of blank reaction containing ABTS solution and DMSO,

B is the absorbance of control reaction containing only DMSO,

C is the absorbance of sample reaction containing sample solution and ABTS solution,

D is the absorbance of control sample containing sample solution and DMSO.

**$\alpha$ -Glucosidase Inhibitory Activity.** A colorimetric  $\alpha$ -glucosidase assay was performed by previous method.<sup>5,6</sup> Briefly, sample solutions were dissolved at different

concentrations (0.1-1000 µg/mL) with 5% dimethyl sulfoxide (DMSO) in phosphate buffer (pH≈6.8), and 50 µL of each sample was pipetted and mixed with 50 µL of α-glucosidase enzyme (0.35 U/mL) in a 96-well microplate and incubated at 37 °C for 10 min. After that, added 50 µL of 1.5 mM *p*-NPG and incubated again at 37 °C for 20 min. Finally, added 100 µL of 1 M Na<sub>2</sub>CO<sub>3</sub> to terminate the reaction. The absorbance was measured at 405 nm with a microplate reader (PerkinElmer, Inc., USA). Acarbose was used as a positive control ( $r^2 = 0.9960$ ,  $IC_{50} = 93.6 \pm 2.1 \mu\text{M}$ , final conc. = 100, 400, 800, 1200, 1600, and 2000 µg/mL). The process was repeated in triplicate, and the percent inhibition was calculated with the following equation:

$$\text{Percent inhibition (\%)} = [((A - B) - (C - D)) / (A - B)] \times 100$$

where,

A is the absorbance of blank reaction containing only 5% DMSO in phosphate buffer,

B is the absorbance of control reaction containing 5% DMSO in phosphate buffer and α-glucosidase enzyme,

C is the absorbance of sample reaction containing sample solution and α-glucosidase enzyme,

D is the absorbance of control sample containing only sample solution.

The concentration of samples that inhibited α-glucosidase activity by 50% was defined as the  $IC_{50}$  value.

## References

- 1 R. Nørbæk, K. Brandt, T. Kondo, *J. Agric. Food Chem.*, 2000, **48**, 1703-1707.
- 2 C. Tantapakul, W. Phakhodee, T. Rittiwigrom, S. Cheenpracha, U. Prawat, S. Deachathai, S. Laphookhieo, *J. Nat. Prod.*, 2012, **75**, 1660-1664.
- 3 I. Polbuppha, W. Maneerat, T. Sripisut, T. Limtharakul, S. Cheenpracha, S. G. Pyne, C. Muanprasat, S. Seemakhan, S. Borwornpinyo, S. Laphookhieo, *Nat. Prod. Commun.*, 2017, **12**, 1073-1076.
- 4 L. Zheng, M. Zhao, C. Xiao, Q. Zhao, G. Su, *Food Chem.*, 2016, **192**, 288-294.
- 5 P. Meesakul, C. Richardson, S. G. Pyne, S. Laphookhieo, *J. Nat. Prod.*, 2019, **82**, 741-747.
- 6 P. Phukhatmuen, A. Raksat, S. Laphookhieo, R. Charoensup, T. Duangyod, W. Maneerat, *Heliyon*, 2020, **6**, e03625.
